# Supplementary material for: Biomarkers of response to ibrutinib plus nivolumab in relapsed diffuse large B-cell lymphoma, follicular lymphoma, or Richter's transformation
Source: PubMed Central journal article supplement — Transl Oncol. 2020 Dec 6;14(1):100977. doi: 10.1016/j.tranon.2020.100977 (PMC7723809; doi:10.1016/j.tranon.2020.100977), 2020-12-06
Supplement: mmc1.pdf [file mmc1.pdf]

## SUPPLEMENTARY MATERIALS

**Supplementary Figure S1.** Filtering criteria used to define likely somatic variants (in the absence of matched normal samples). COSMIC, Catalogue of Somatic Mutations in Cancer; CSE, context-specific errors; dbSNP, single nucleotide polymorphism; ESP, exome sequencing project; ExAC, exome aggregation consortium; FLAGS, frequently mutated genes in public exomes (Shyr C, et al. *BMC Med Genomics*. 2014;7:64); GDI, gene damage index (Itan Y, et al. *Proc Natl Acad Sci U S A*. 2014;112:13615-13620); gnomAD, genome aggregation database; MAF, minor allele frequency; MMY PoN, in-house panel of normals (from the phase III multiple myeloma studies CASTOR and POLLUX [Mateos MV, et al. *Haematologica*. 2020;105:468-477]); VAF, variant allele frequency.

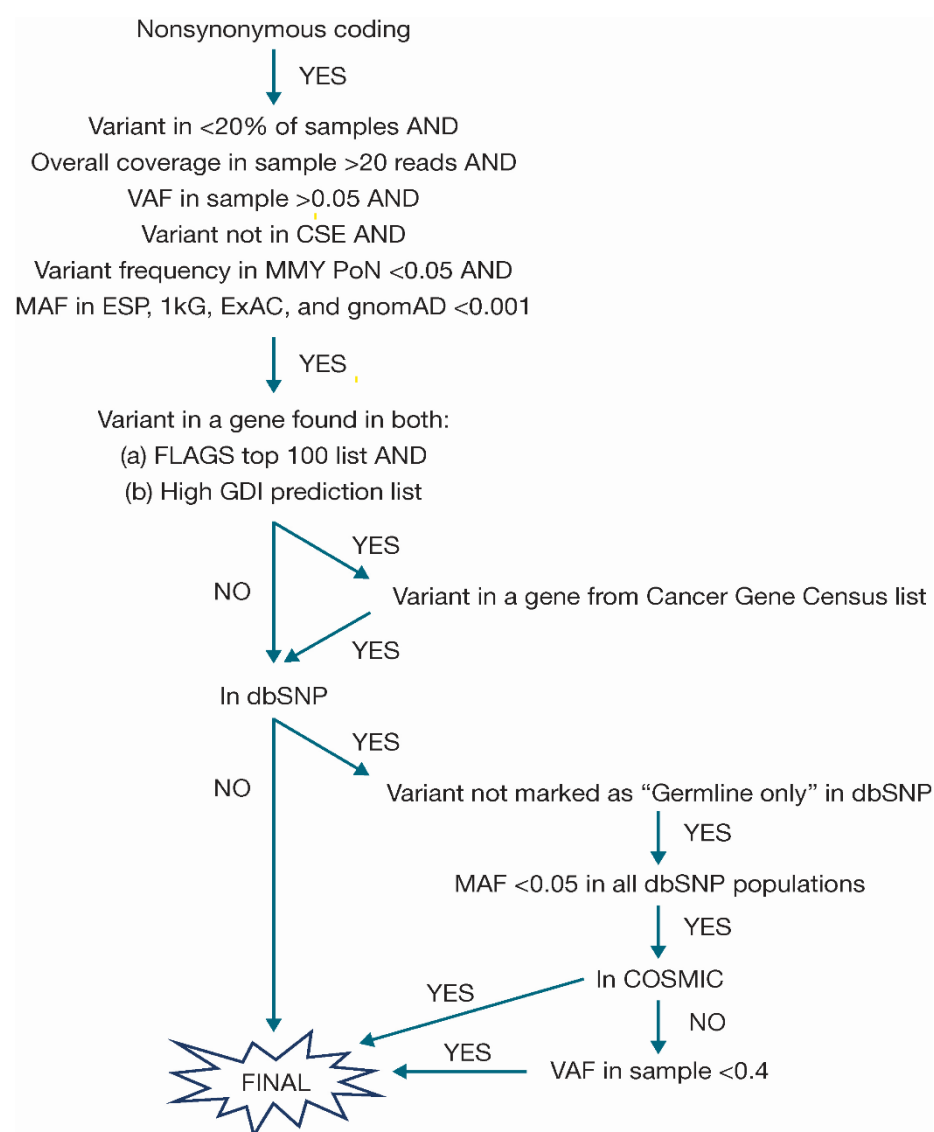

**Supplementary Figure S2.** PD-L1 expression in DLBCL. DLBCL, diffuse large B-cell lymphoma, PD-L1, programmed death ligand 1.

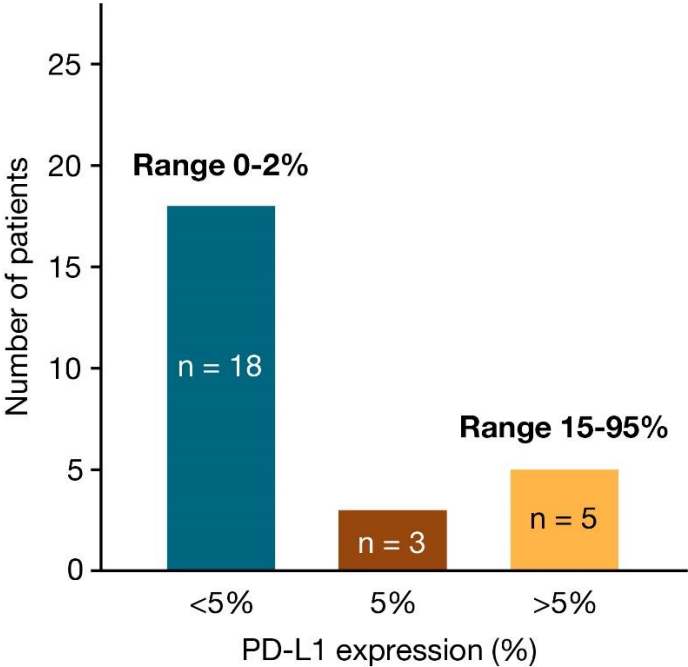

**Supplementary Figure S3.** TMB for responders versus nonresponders in DLBCL (A), GCB DLBCL (B), FL (C), and RT (D), plus patients with DLBCL with PFS >24 versus ≤24 months (E). Data are expressed as the number of mutations per megabase. DLBCL, diffuse large B-cell lymphoma; FL, follicular lymphoma; GCB, germinal center B-cell–like; PFS, progression-free survival; RT, Richter’s transformation; TMB, tumor mutational burden.

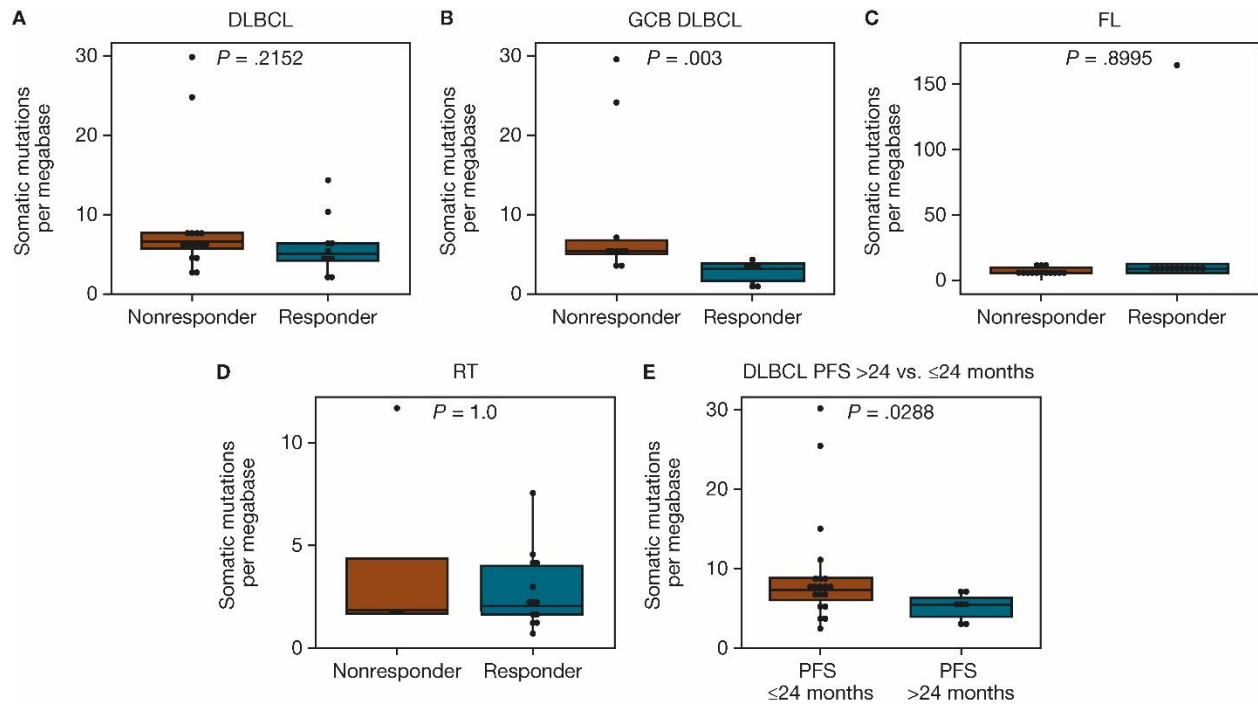

## Supplementary Table S1

Functional Groupings of Genes Utilized in Pathway/Gene Set-Level Mutation Analyses

| Pathway        | Gene          | Pathway              | Gene             | Pathway            | Gene           |
|----------------|---------------|----------------------|------------------|--------------------|----------------|
| Apoptosis      | <i>CDKN2A</i> | Canonical NFkB       | <i>MYD88</i>     | MAPK signaling     | <i>MAPK3</i>   |
| Apoptosis      | <i>CDKN2B</i> | Canonical NFkB       | <i>NFKB1</i>     | MAPK signaling     | <i>MAPK1</i>   |
| Apoptosis      | <i>MDM2</i>   | Canonical NFkB       | <i>NFKBIB</i>    | MTTP               | <i>MTTP</i>    |
| Apoptosis      | <i>RIPK1</i>  | Canonical NFkB       | <i>REL</i>       | NFkB               | <i>NFKBIA</i>  |
| Apoptosis      | <i>TP53</i>   | Canonical NFkB       | <i>TLR2</i>      | NFkB               | <i>TNFAIP3</i> |
| Apoptosis      | <i>VRK2</i>   | Canonical NFkB       | <i>TNF</i>       | Non-canonical NFkB | <i>BIRC2</i>   |
| BCR signaling  | <i>BCL10</i>  | Canonical NFkB       | <i>TNFRSF11A</i> | Non-canonical NFkB | <i>BIRC3</i>   |
| BCR signaling  | <i>BLK</i>    | Canonical NFkB       | <i>TNFRSF13B</i> | Non-canonical NFkB | <i>CD40</i>    |
| BCR signaling  | <i>BLNK</i>   | Canonical NFkB       | <i>TNFRSF13C</i> | Non-canonical NFkB | <i>CYLD</i>    |
| BCR signaling  | <i>BMX</i>    | Canonical NFkB       | <i>TNFSF13B</i>  | Non-canonical NFkB | <i>MAP3K14</i> |
| BCR signaling  | <i>BTK</i>    | Canonical NFkB       | <i>TRAF1</i>     | Non-canonical NFkB | <i>NFKB2</i>   |
| BCR signaling  | <i>CARD11</i> | Canonical NFkB       | <i>TRAF4</i>     | Non-canonical NFkB | <i>RELB</i>    |
| BCR signaling  | <i>CD79A</i>  | Canonical NFkB       | <i>TRAF5</i>     | Non-canonical NFkB | <i>TRAF2</i>   |
| BCR signaling  | <i>CD79B</i>  | Canonical NFkB       | <i>TRAF6</i>     | Non-canonical NFkB | <i>TRAF3</i>   |
| BCR signaling  | <i>CSK</i>    | DNA repair           | <i>ATM</i>       | Other oncogenes    | <i>BCL2</i>    |
| BCR signaling  | <i>GRB2</i>   | DNA repair           | <i>CHEK2</i>     | Other oncogenes    | <i>BCL6</i>    |
| BCR signaling  | <i>ITK</i>    | EGFR signaling       | <i>EGFR</i>      | Other oncogenes    | <i>MCL1</i>    |
| BCR signaling  | <i>LCK</i>    | EGFR signaling       | <i>ERBB2</i>     | Other oncogenes    | <i>MET</i>     |
| BCR signaling  | <i>LYN</i>    | EGFR signaling       | <i>ERBB4</i>     | Other oncogenes    | <i>MYC</i>     |
| BCR signaling  | <i>PLCG2</i>  | EGFR signaling       | <i>RGS4</i>      | Other oncogenes    | <i>PIM1</i>    |
| BCR signaling  | <i>PRKCB</i>  | Epigenetic modifiers | <i>CREBBP</i>    | Other oncogenes    | <i>RET</i>     |
| BCR signaling  | <i>SYK</i>    | Epigenetic modifiers | <i>EP300</i>     | PI3K signaling     | <i>AKT1</i>    |
| BCR signaling  | <i>TEC</i>    | Epigenetic modifiers | <i>EZH2</i>      | PI3K signaling     | <i>MTOR</i>    |
| BCR signaling  | <i>TXK</i>    | Epigenetic modifiers | <i>MLL2</i>      | PI3K signaling     | <i>PIK3R1</i>  |
| Canonical NFkB | <i>IKBKB</i>  | Epigenetic modifiers | <i>PRDM1</i>     | PI3K signaling     | <i>PI3KD</i>   |
| Canonical NFkB | <i>IKBKG</i>  | Epigenetic modifiers | <i>TPMT</i>      | PI3K signaling     | <i>PTEN</i>    |
| Canonical NFkB | <i>IRF4</i>   | Epigenetic modifiers | <i>WHSC1</i>     | Proliferation      | <i>BTG1</i>    |
| Canonical NFkB | <i>IRS2</i>   | JAK/STAT signaling   | <i>JAK2</i>      | Proliferation      | <i>CCND3</i>   |
| Canonical NFkB | <i>MALT1</i>  | JAK/STAT signaling   | <i>JAK3</i>      | Proliferation      | <i>CEBPA</i>   |
| Canonical NFkB | <i>MAP3K7</i> | JAK/STAT signaling   | <i>SOCS1</i>     | VEGFA              | <i>VEGFA</i>   |
| Canonical NFkB | <i>TAB2</i>   | JAK/STAT signaling   | <i>STAT3</i>     | Wnt signaling      | <i>NOTCH1</i>  |
| Canonical NFkB | <i>TAB3</i>   | JAK/STAT signaling   | <i>STAT6</i>     |                    |                |

**Supplementary Table S2**

PD-L1 Expression in DLBCL by IHC

|                                                                                | <b>DLBCL</b>        |                                          |                     |                             |                       |
|--------------------------------------------------------------------------------|---------------------|------------------------------------------|---------------------|-----------------------------|-----------------------|
|                                                                                | All<br><i>N</i> =26 | Patients with GEP subtyping and IHC data |                     |                             | Total<br><i>n</i> =24 |
|                                                                                |                     | ABC<br><i>n</i> =3                       | GCB<br><i>n</i> =17 | Unclassified<br><i>n</i> =4 |                       |
| <b>Patients with PD-L1 in <math>\geq</math>5% of tumor cells, <i>n</i> (%)</b> | 8/26 (30.8)         | 1 (33.3)                                 | 4 (23.5)            | 1 (25.0)                    | 6 (25.0)              |
| Proportion responding (CR or PR)                                               | 5/8                 | 0/1                                      | 3/4                 | 0/1                         | 3/6                   |

### Supplementary Table S3

Frequencies of Gene Mutations Reported to be Functionally Relevant in Pathogenesis of DLBCL<sup>a</sup>

| <b>Gene</b>     | <b>Responders<br/>(n=10)</b> | <b>Nonresponders<br/>(n=16)</b> | <b>Odds Ratio (95% CI)</b> | <b>P Value</b> |
|-----------------|------------------------------|---------------------------------|----------------------------|----------------|
| <i>TP53</i>     | 0 (0.0%)                     | 3 (18.8%)                       | 0.000 (0.000–3.825)        | .262           |
| <i>TNFRSF14</i> | 0 (0.0%)                     | 3 (18.8%)                       | 0.000 (0.000–3.825)        | .262           |
| <i>CREBBP</i>   | 1 (10.0%)                    | 5 (31.2%)                       | 0.257 (0.005–2.940)        | .352           |
| <i>CARD11</i>   | 1 (10.0%)                    | 0 (0.0%)                        | Inf (0.041–Inf)            | .385           |
| <i>KMT2D</i>    | 2 (20.0%)                    | 6 (37.5%)                       | 0.430 (0.034–3.353)        | .420           |
| <i>MYD88</i>    | 0 (0.0%)                     | 2 (12.5%)                       | 0.000 (0.000–8.573)        | .508           |
| <i>GNA13</i>    | 0 (0.0%)                     | 2 (12.5%)                       | 0.000 (0.000–8.573)        | .508           |
| <i>EZH2</i>     | 1 (10.0%)                    | 2 (12.5%)                       | 0.785 (0.012–17.245)       | 1.000          |
| <i>CD79B</i>    | 1 (10.0%)                    | 2 (12.5%)                       | 0.785 (0.012–17.245)       | 1.000          |
| <i>BTG1</i>     | 1 (10.0%)                    | 3 (18.8%)                       | 0.494 (0.008–7.368)        | 1.000          |
| <i>MEF2B</i>    | 2 (20.0%)                    | 3 (18.8%)                       | 1.080 (0.075–11.763)       | 1.000          |

<sup>a</sup>Gene mutations chosen for inclusion in the table were reported in the literature (Lohr JG, et al. *Proc Natl Acad Sci U S A*. 2012;109:3879-3884).

**Supplementary Table S4**

Frequent Differentially Mutated Genes between Responders and Nonresponders in Germinal Center B-Cell-Like Diffuse Large B-Cell Lymphoma

| <b>Gene</b>                                     | <b>Responders<br/>(n=6)</b> | <b>Nonresponders<br/>(n=10)</b> | <b>Odds Ratio (95% CI)</b> | <b>P Value</b> |
|-------------------------------------------------|-----------------------------|---------------------------------|----------------------------|----------------|
| <i>Mutations more frequent in responders</i>    |                             |                                 |                            |                |
| <i>AMPH</i>                                     | 1/6 (16.7%)                 | 0/10 (0.0%)                     | Inf (0.043–Inf)            | .375           |
| <i>AXIN1</i>                                    | 1/6 (16.7%)                 | 0/10 (0.0%)                     | Inf (0.043–Inf)            | .375           |
| <i>BRCA2</i>                                    | 1/6 (16.7%)                 | 0/10 (0.0%)                     | Inf (0.043–Inf)            | .375           |
| <i>CAMTA1</i>                                   | 1/6 (16.7%)                 | 0/10 (0.0%)                     | Inf (0.043–Inf)            | .375           |
| <i>CEBPA</i>                                    | 1/6 (16.7%)                 | 0/10 (0.0%)                     | Inf (0.043–Inf)            | .375           |
| <i>CLTC</i>                                     | 1/6 (16.7%)                 | 0/10 (0.0%)                     | Inf (0.043–Inf)            | .375           |
| <i>Mutations more frequent in nonresponders</i> |                             |                                 |                            |                |
| <i>CSMD3</i>                                    | 0/6 (0.0%)                  | 5/10 (50.0%)                    | 0.000 (0.000–1.503)        | .093           |
| <i>BCL2</i>                                     | 1/6 (16.7%)                 | 6/10 (60.0%)                    | 0.152 (0.002–2.144)        | .145           |
| <i>KMT2D</i>                                    | 1/6 (16.7%)                 | 6/10 (60.0%)                    | 0.152 (0.002–2.144)        | .145           |
| <i>CREBBP</i>                                   | 0/6 (0.0%)                  | 4/10 (40.0%)                    | 0.000 (0.000–2.314)        | .234           |
| <i>EBF1</i>                                     | 0/6 (0.0%)                  | 4/10 (40.0%)                    | 0.000 (0.000–2.314)        | .234           |
| <i>SGK1</i>                                     | 0/6 (0.0%)                  | 4/10 (40.0%)                    | 0.000 (0.000–2.314)        | .234           |
| <i>BCL7A</i>                                    | 0/6 (0.0%)                  | 3/10 (30.0%)                    | 0.000 (0.000–3.967)        | .250           |
| <i>BTG1</i>                                     | 0/6 (0.0%)                  | 3/10 (30.0%)                    | 0.000 (0.000–3.967)        | .250           |
| <i>CHD8</i>                                     | 0/6 (0.0%)                  | 3/10 (30.0%)                    | 0.000 (0.000–3.967)        | .250           |
| <i>FOXO1</i>                                    | 0/6 (0.0%)                  | 3/10 (30.0%)                    | 0.000 (0.000–3.967)        | .250           |
| <i>GPR124</i>                                   | 0/6 (0.0%)                  | 3/10 (30.0%)                    | 0.000 (0.000–3.967)        | .250           |
| <i>HIST1H1E</i>                                 | 0/6 (0.0%)                  | 3/10 (30.0%)                    | 0.000 (0.000–3.967)        | .250           |
| <i>KIAA1109</i>                                 | 0/6 (0.0%)                  | 3/10 (30.0%)                    | 0.000 (0.000–3.967)        | .250           |
| <i>P2RY8</i>                                    | 0/6 (0.0%)                  | 3/10 (30.0%)                    | 0.000 (0.000–3.967)        | .250           |
| <i>SPTA1</i>                                    | 0/6 (0.0%)                  | 3/10 (30.0%)                    | 0.000 (0.000–3.967)        | .250           |
| <i>TNFRSF14</i>                                 | 0/6 (0.0%)                  | 3/10 (30.0%)                    | 0.000 (0.000–3.967)        | .250           |
| <i>ZNF608</i>                                   | 0/6 (0.0%)                  | 3/10 (30.0%)                    | 0.000 (0.000–3.967)        | .250           |

**Supplementary Table S5**

Differentially Expressed Genes Between Responders and Nonresponders with Diffuse Large B-Cell Lymphoma

| <b>Gene</b>                                       | <b>Description</b>                                                   | <b>Log FC</b> | <b>Adjusted P Value</b> |
|---------------------------------------------------|----------------------------------------------------------------------|---------------|-------------------------|
| <i>Genes upregulated in the responder group</i>   |                                                                      |               |                         |
| <i>CPVL</i>                                       | Carboxypeptidase, vitellogenic-like                                  | 1.274         | 1.000                   |
| <i>E2F3</i>                                       | E2F transcription factor 3                                           | 0.634         | 1.000                   |
| <i>CD163</i>                                      | CD163 molecule                                                       | 1.854         | 1.000                   |
| <i>LGMN</i>                                       | Legumain                                                             | 1.718         | 1.000                   |
| <i>ARFGAP3</i>                                    | ADP-ribosylation factor GTPase activating protein 3                  | 1.175         | 1.000                   |
| <i>C1orf54</i>                                    | Chromosome 1 open reading frame 54                                   | 0.955         | 1.000                   |
| <i>BRD7P3</i>                                     | Bromodomain containing 7 pseudogene 3                                | 0.709         | 1.000                   |
| <i>GPRIN3</i>                                     | GPRIN family member 3                                                | 1.345         | 1.000                   |
| <i>LMBRD1</i>                                     | LMBR1 domain containing 1                                            | 1.050         | 1.000                   |
| <i>GGTA1P</i>                                     | Glycoprotein, alpha-galactosyltransferase 1 pseudogene               | 0.877         | 1.000                   |
| <i>ATE1</i>                                       | Arginyltransferase 1                                                 | 0.705         | 1.000                   |
| <i>ZNF432</i>                                     | Zinc finger protein 432                                              | 1.547         | 1.000                   |
| <i>CRTAM</i>                                      | Cytotoxic and regulatory T cell molecule                             | 1.604         | 1.000                   |
| <i>METTL18</i>                                    | Methyltransferase like 18                                            | 0.734         | 1.000                   |
| <i>C2orf74</i>                                    | Chromosome 2 open reading frame 74                                   | 1.345         | 1.000                   |
| <i>CCL4</i>                                       | Chemokine (C-C motif) ligand 4                                       | 0.929         | 1.000                   |
| <i>GIMAP1</i>                                     | GTPase, IMAP family member 1                                         | 0.772         | 1.000                   |
| <i>BCL11B</i>                                     | B-cell CLL/lymphoma 11B (zinc finger protein)                        | 0.970         | 1.000                   |
| <i>STAT5A</i>                                     | Signal transducer and activator of transcription 5A                  | 0.975         | 1.000                   |
| <i>GPR19</i>                                      | G protein-coupled receptor 19                                        | 0.884         | 1.000                   |
| <i>Genes downregulated in the responder group</i> |                                                                      |               |                         |
| <i>C10orf12</i>                                   | Chromosome 10 open reading frame 12                                  | -0.883        | 1.000                   |
| <i>SGCE</i>                                       | Sarcoglycan, epsilon                                                 | -1.597        | 1.000                   |
| <i>ZDHHC23</i>                                    | Zinc finger, DHHC-type containing 23                                 | -0.975        | 1.000                   |
| <i>TPPP</i>                                       | Tubulin polymerization promoting protein                             | -0.771        | 1.000                   |
| <i>TIGD1</i>                                      | Tigger transposable element derived 1                                | -1.357        | 1.000                   |
| <i>C5orf66</i>                                    | Chromosome 5 open reading frame 66                                   | -0.712        | 1.000                   |
| <i>HIST1H2AL</i>                                  | Histone cluster 1, H2al                                              | -0.891        | 1.000                   |
| <i>PCGF1</i>                                      | Polycomb group ring finger 1                                         | -0.675        | 1.000                   |
| <i>ASPM</i>                                       | Abnormal spindle microtubule assembly                                | -1.135        | 1.000                   |
| <i>KIF11</i>                                      | Kinesin family member 11                                             | -1.390        | 1.000                   |
| <i>LOC728613</i>                                  | Programmed cell death 6 pseudogene                                   | -1.116        | 1.000                   |
| <i>ZNF587</i>                                     | Zinc finger protein 587                                              | -0.717        | 1.000                   |
| <i>ARR3</i>                                       | Arrestin 3, retinal (X-arrestin)                                     | -0.785        | 1.000                   |
| <i>LEAP2</i>                                      | Liver expressed antimicrobial peptide 2                              | -0.581        | 1.000                   |
| <i>LRRC1</i>                                      | Leucine rich repeat containing 1                                     | -1.069        | 1.000                   |
| <i>FAM58A</i>                                     | Family with sequence similarity 58, member A                         | -0.565        | 1.000                   |
| <i>HMGCS1</i>                                     | 3-hydroxy-3-methylglutaryl-CoA synthase 1 (soluble)                  | -0.668        | 1.000                   |
| <i>SLC25A37</i>                                   | Solute carrier family 25 (mitochondrial iron transporter), member 37 | -0.684        | 1.000                   |
| <i>DNMBP</i>                                      | Dynamin binding protein                                              | -0.925        | 1.000                   |
| <i>HILPDA</i>                                     | Hypoxia inducible lipid droplet-associated                           | -0.631        | 1.000                   |



**Supplementary Table S6**

Differentially Expressed Genes Between Responders and Nonresponders with Follicular Lymphoma

| <b>Gene</b>                                       | <b>Description</b>                                          | <b>Log FC</b> | <b>Adjusted P Value</b> |
|---------------------------------------------------|-------------------------------------------------------------|---------------|-------------------------|
| <i>Genes upregulated in the responder group</i>   |                                                             |               |                         |
| <i>CCL21</i>                                      | Chemokine (C-C motif) ligand 21                             | 1.671         | .6                      |
| <i>TESPA1</i>                                     | Thymocyte expressed, positive selection associated 1        | 0.785         | .6                      |
| <i>CDCA7L</i>                                     | Cell division cycle associated 7-like                       | 0.967         | .6                      |
| <i>PRPSAP1</i>                                    | Phosphoribosyl pyrophosphate synthetase-associated protein1 | 0.757         | .6                      |
| <i>LEPROTL1</i>                                   | Leptin receptor overlapping transcript-like 1               | 1.017         | .6                      |
| <i>LEF1</i>                                       | Lymphoid enhancer-binding factor 1                          | 0.923         | .6                      |
| <i>MYB</i>                                        | V-myb avian myeloblastosis viral oncogene homolog           | 1.114         | .6                      |
| <i>DNAJC16</i>                                    | DnaJ (Hsp40) homolog, subfamily C, member 16                | 0.710         | .6                      |
| <i>SMAD1</i>                                      | SMAD family member 1                                        | 1.188         | .6                      |
| <i>SNRPB2</i>                                     | Small nuclear ribonucleoprotein polypeptide B               | 0.571         | .6                      |
| <i>LAMP3</i>                                      | Lysosomal-associated membrane protein 3                     | 1.115         | .6                      |
| <i>C7orf55</i>                                    | Chromosome 7 open reading frame 55                          | 0.561         | .6                      |
| <i>HIST1H2BH</i>                                  | Histone cluster 1, H2bh                                     | 0.642         | .6                      |
| <i>LINC00525</i>                                  | Long intergenic non-protein coding RNA 525                  | 1.369         | .6                      |
| <i>NPY1R</i>                                      | Neuropeptide Y receptor Y1                                  | 1.422         | .6                      |
| <i>SLC25A25-AS1</i>                               | SLC25A25 antisense RNA 1                                    | 0.621         | .6                      |
| <i>SLA</i>                                        | Src-like-adaptor                                            | 0.728         | .6                      |
| <i>SFT2D1</i>                                     | SFT2 domain containing 1                                    | 0.936         | .6                      |
| <i>ZMAT2</i>                                      | Zinc finger, matrin-type 2                                  | 0.715         | .6                      |
| <i>STARD7</i>                                     | StAR-related lipid transfer (START) domain containing 7     | 0.746         | .6                      |
| <i>Genes downregulated in the responder group</i> |                                                             |               |                         |
| <i>IQCG</i>                                       | IQ motif containing G                                       | -1.085        | .6                      |
| <i>BHLHE41</i>                                    | Basic helix-loop-helix family, member e41                   | -0.893        | .6                      |
| <i>FOSL1</i>                                      | FOS-like antigen 1                                          | -1.258        | .6                      |
| <i>TEX41</i>                                      | Testis expressed 41 (non-protein coding)                    | -0.590        | .6                      |
| <i>ZYG11A</i>                                     | Zyg-11 family member A, cell cycle regulator                | -0.956        | .6                      |
| <i>ZDHHC4</i>                                     | Zinc finger, DHHC-type containing 4                         | -0.842        | .6                      |
| <i>TEAD3</i>                                      | TEA domain family member 3                                  | -0.965        | .6                      |
| <i>EFNA1</i>                                      | Ephrin-A1                                                   | -0.650        | .6                      |
| <i>FAT4</i>                                       | FAT atypical cadherin 4                                     | -1.188        | .6                      |
| <i>SLC46A2</i>                                    | Solute carrier family 46, member 2                          | -0.478        | .6                      |
| <i>CASC15</i>                                     | Cancer susceptibility candidate 15 (non-protein coding)     | -0.577        | .6                      |
| <i>BBS12</i>                                      | Bardet-Biedl syndrome 12                                    | -0.592        | .6                      |
| <i>TIGD6</i>                                      | Tigger transposable element derived 6                       | -0.515        | .6                      |
| <i>MRAS</i>                                       | Muscle RAS oncogene homolog                                 | -0.501        | .6                      |
| <i>PTH2R</i>                                      | Parathyroid hormone 2 receptor                              | -0.452        | .6                      |
| <i>LINC01607</i>                                  | Long intergenic non-protein coding RNA 1607                 | -0.631        | .6                      |
| <i>STEAP1</i>                                     | Six transmembrane epithelial antigen of the prostate 1      | -0.873        | .6                      |
| <i>PDE8B</i>                                      | Phosphodiesterase 8B                                        | -0.486        | .6                      |
| <i>FIBIN</i>                                      | Fin bud initiation factor homolog (zebrafish)               | -0.585        | .6                      |
| <i>RHD</i>                                        | Rh blood group, D antigen                                   | -0.722        | .6                      |

## Supplementary Table S7

### Differentially Expressed Genes Between Responders and Nonresponders with Richter's Transformation

| Gene                                              | Description                                                                                         | Log FC | Adjusted P Value |
|---------------------------------------------------|-----------------------------------------------------------------------------------------------------|--------|------------------|
| <i>Genes upregulated in the responder group</i>   |                                                                                                     |        |                  |
| <i>BTLA</i>                                       | B and T lymphocyte associated                                                                       | 2.137  | .391             |
| <i>ANKRD44-IT1</i>                                | ANKRD44 intronic transcript 1                                                                       | 2.041  | .391             |
| <i>PVRIG</i>                                      | Poliovirus receptor related immunoglobulin domain containing                                        | 1.213  | .391             |
| <i>FCER2</i>                                      | Fc fragment of IgE, low affinity II, receptor for (CD23)                                            | 2.190  | .485             |
| <i>ARHGAP15</i>                                   | Rho GTPase activating protein 15                                                                    | 1.364  | .569             |
| <i>CCND2</i>                                      | Cyclin D2                                                                                           | 2.096  | .603             |
| <i>FCMR</i>                                       | Fc fragment of IgM receptor                                                                         | 2.742  | .653             |
| <i>FRG1EP</i>                                     | FSDH region gene 1 family member E, pseudogene                                                      | 2.766  | .761             |
| <i>CELF2-AS1</i>                                  | CELF2 antisense RNA 1                                                                               | 1.523  | .788             |
| <i>SLAMF6</i>                                     | SLAM family member 6                                                                                | 1.574  | .930             |
| <i>LCK</i>                                        | LCK proto-oncogene, Src family tyrosine kinase                                                      | 0.961  | .930             |
| <i>FMO4</i>                                       | Flavin containing monooxygenase 4                                                                   | 1.598  | .930             |
| <i>PATL2</i>                                      | Protein associated with topoisomerase II homolog 2 (yeast)                                          | 1.688  | .953             |
| <i>FRG1CP</i>                                     | FSDH region gene 1 family member C, pseudogene                                                      | 2.041  | .953             |
| <i>RAC2</i>                                       | Ras-related C3 botulinum toxin substrate 2 (rho family, small GTP binding protein Rac2)             | 1.133  | .953             |
| <i>KLHL6</i>                                      | Kelch-like family member 6                                                                          | 1.249  | 1.000            |
| <i>CD48</i>                                       | CD48 molecule                                                                                       | 1.695  | 1.000            |
| <i>FCRLA</i>                                      | Fc receptor-like A                                                                                  | 1.997  | 1.000            |
| <i>AFF3</i>                                       | AF4/FMR2 family, member 3                                                                           | 1.487  | 1.000            |
| <i>Genes downregulated in the responder group</i> |                                                                                                     |        |                  |
| <i>CCDC17</i>                                     | Coiled-coil domain containing 17                                                                    | -1.73  | .391             |
| <i>SLC47A1</i>                                    | Solute carrier family 47 (multidrug and toxin extrusion), member 1                                  | -2.03  | .391             |
| <i>NEK2</i>                                       | NIMA-related kinase 2                                                                               | -1.63  | .391             |
| <i>RTTN</i>                                       | Rotatin                                                                                             | -1.24  | .391             |
| <i>OGN</i>                                        | Osteoglycin                                                                                         | -1.23  | .391             |
| <i>VGLL3</i>                                      | Vestigial-like family member 3                                                                      | -1.49  | .472             |
| <i>ZNF426</i>                                     | Zinc finger protein 426                                                                             | -1.76  | .569             |
| <i>CENPI</i>                                      | Centromere protein I                                                                                | -1.32  | .569             |
| <i>GS1-600G8.3</i>                                | Unknown transcript                                                                                  | -1.46  | .569             |
| <i>MYO5C</i>                                      | Myosin VC                                                                                           | -1.87  | .650             |
| <i>DEPDC1</i>                                     | DEP domain containing 1                                                                             | -1.19  | .650             |
| <i>LRP11</i>                                      | Low density lipoprotein receptor-related protein 11                                                 | -1.12  | .788             |
| <i>GLDC</i>                                       | Glycine dehydrogenase (decarboxylating)                                                             | -1.95  | .788             |
| <i>STEAP1</i>                                     | Six transmembrane epithelial antigen of the prostate 1                                              | -2.22  | .930             |
| <i>ILDR2</i>                                      | Immunoglobulin-like domain containing receptor 2                                                    | -1.34  | .930             |
| <i>MLLT3</i>                                      | Myeloid/lymphoid or mixed-lineage leukemia; translocated to3'                                       | -1.61  | .930             |
| <i>UBAC1</i>                                      | UBA domain containing 1                                                                             | -1.00  | .930             |
| <i>NEDD4L</i>                                     | Neural precursor cell expressed, developmentally down-regulated 4-like, E3 ubiquitin protein ligase | -1.14  | .930             |
| <i>RHOBTB1</i>                                    | Rho-related BTB domain containing 1                                                                 | -1.23  | .930             |
| <i>TTC25</i>                                      | Tetratricopeptide repeat domain 25                                                                  | -1.34  | .953             |

## Supplementary Table S8

Most Enriched Pathways in Responders and Nonresponders to Ibrutinib plus Nivolumab with Diffuse Large B-cell Lymphoma

| Pathway Name                                                                          | NES   | FDR<br>P Value | FWER<br>P Value |
|---------------------------------------------------------------------------------------|-------|----------------|-----------------|
| <i>Responders</i>                                                                     |       |                |                 |
| IL-12_2 pathway <sup>a</sup>                                                          | 2.38  | .000           | .000            |
| Immunoregulatory interactions between a lymphoid and a non-lymphoid cell <sup>b</sup> | 2.31  | .000           | .000            |
| T-cell receptor signalling pathway <sup>c</sup>                                       | 2.19  | .000           | .000            |
| TCR signalling <sup>b</sup>                                                           | 2.16  | .000           | .001            |
| Lysosome <sup>c</sup>                                                                 | 2.15  | .000           | .001            |
| Chemokine signalling pathway <sup>c</sup>                                             | 2.12  | .000           | .002            |
| Chemokine receptors bind chemokines <sup>b</sup>                                      | 2.10  | .001           | .005            |
| T-cell signal transduction <sup>e</sup>                                               | 2.09  | .001           | .007            |
| CD8 TCR pathway <sup>a</sup>                                                          | 2.08  | .001           | .008            |
| IL-12/STAT4 pathway <sup>a</sup>                                                      | 2.08  | .001           | .009            |
| N glycan biosynthesis <sup>c</sup>                                                    | 2.08  | .001           | .009            |
| NO2/IL-12 pathway <sup>d</sup>                                                        | 2.08  | .001           | .009            |
| IL-12 pathway <sup>d</sup>                                                            | 2.07  | .001           | .010            |
| TCR pathway <sup>a</sup>                                                              | 2.05  | .001           | .020            |
| Generation of second messenger molecules <sup>b</sup>                                 | 2.04  | .001           | .023            |
| IL-27 pathway <sup>a</sup>                                                            | 2.02  | .002           | .028            |
| Asparagine N-linked glycosylation <sup>b</sup>                                        | 2.02  | .002           | .030            |
| Interferon gamma signaling <sup>b</sup>                                               | 2.00  | .003           | .051            |
| Cytokine-cytokine receptor interaction <sup>c</sup>                                   | 1.98  | .004           | .075            |
| FCER1 pathway <sup>a</sup>                                                            | 1.94  | .007           | .134            |
| <i>Nonresponders</i>                                                                  |       |                |                 |
| Peptide chain elongation <sup>b</sup>                                                 | -2.46 | .000           | .000            |
| Ribosome <sup>c</sup>                                                                 | -2.36 | .000           | .000            |
| Cell-cycle mitotic <sup>b</sup>                                                       | -2.33 | .000           | .000            |
| G2/M checkpoints <sup>b</sup>                                                         | -2.31 | .000           | .000            |
| Cell cycle <sup>b</sup>                                                               | -2.30 | .000           | .000            |
| Activation of ATR in response to replication stress <sup>b</sup>                      | -2.24 | .000           | .000            |
| E2F-mediated regulation of DNA replication <sup>b</sup>                               | -2.24 | .000           | .000            |
| Nonsense-mediated decay enhanced by the exon junction complex <sup>b</sup>            | -2.21 | .000           | .002            |
| DNA replication <sup>b</sup>                                                          | -2.21 | .000           | .002            |
| G1/S transition <sup>b</sup>                                                          | -2.21 | .000           | .002            |
| MYC active pathway <sup>a</sup>                                                       | -2.21 | .000           | .002            |
| Influenza viral RNA transcription and replication <sup>b</sup>                        | -2.19 | .000           | .005            |
| 3UTR-mediated translational regulation <sup>b</sup>                                   | -2.14 | .001           | .008            |
| Influenza life cycle <sup>b</sup>                                                     | -2.12 | .001           | .010            |
| Activation of the pre-replicative complex <sup>b</sup>                                | -2.12 | .001           | .010            |
| Mitotic M_M/G1 phases <sup>b</sup>                                                    | -2.12 | .001           | .010            |
| Glycolysis <sup>b</sup>                                                               | -2.12 | .001           | .010            |
| Mitotic G1_G1_S phases <sup>b</sup>                                                   | -2.07 | .001           | .025            |
| DNA strand elongation <sup>b</sup>                                                    | -2.07 | .002           | .028            |
| Cholesterol_biosynthesis <sup>b</sup>                                                 | -2.05 | .002           | .039            |

Databases: <sup>a</sup>PID; <sup>b</sup>REACTOME; <sup>c</sup>KEGG; <sup>d</sup>BIOCARTA; <sup>e</sup>ST.

## Supplementary Table S9

Most Enriched Pathways in Responders and Nonresponders to Ibrutinib plus Nivolumab with Follicular Lymphoma

| Pathway Name                                                               | NES   | FDR<br>P-Value | FWER<br>P Value |
|----------------------------------------------------------------------------|-------|----------------|-----------------|
| <i>Responders</i>                                                          |       |                |                 |
| Metabolism of RNA <sup>a</sup>                                             | 3.35  | .000           | .000            |
| Translation <sup>a</sup>                                                   | 3.33  | .000           | .000            |
| SRP-dependent cotranslational protein targeting to membrane <sup>a</sup>   | 3.24  | .000           | .000            |
| Influenza life cycle <sup>a</sup>                                          | 3.24  | .000           | .000            |
| 3'UTR-mediated translational regulation <sup>a</sup>                       | 3.19  | .000           | .000            |
| Metabolism of mRNA <sup>a</sup>                                            | 3.18  | .000           | .000            |
| Peptide chain elongation <sup>a</sup>                                      | 3.17  | .000           | .000            |
| Processing of capped intron containing pre-mRNA <sup>a</sup>               | 3.08  | .000           | .000            |
| mRNA processing <sup>a</sup>                                               | 3.05  | .000           | .000            |
| Ribosome <sup>b</sup>                                                      | 3.04  | .000           | .000            |
| Influenza viral RNA transcription and replication <sup>a</sup>             | 3.03  | .000           | .000            |
| Spliceosome <sup>b</sup>                                                   | 3.00  | .000           | .000            |
| Nonsense mediated decay enhanced by the exon junction complex <sup>a</sup> | 2.99  | .000           | .000            |
| Antiviral mechanism by IFN stimulated genes <sup>a</sup>                   | 2.91  | .000           | .000            |
| Signaling by the BCR <sup>a</sup>                                          | 2.90  | .000           | .000            |
| Transcription <sup>a</sup>                                                 | 2.89  | .000           | .000            |
| mRNA splicing <sup>a</sup>                                                 | 2.89  | .000           | .000            |
| HIV infection <sup>a</sup>                                                 | 2.88  | .000           | .000            |
| BCR 5 pathway <sup>c</sup>                                                 | 2.83  | .000           | .000            |
| Host interactions of HIV factors <sup>a</sup>                              | 2.82  | .000           | .000            |
| <i>Nonresponders</i>                                                       |       |                |                 |
| Core matrisome <sup>d</sup>                                                | -2.88 | .000           | .000            |
| ECM glycoproteins <sup>d</sup>                                             | -2.80 | .000           | .000            |
| ECM organization <sup>a</sup>                                              | -2.58 | .000           | .000            |
| Neuroactive ligand-receptor interaction <sup>b</sup>                       | -2.56 | .000           | .000            |
| Olfactory signaling pathway <sup>a</sup>                                   | -2.49 | .000           | .000            |
| ECM-receptor interaction <sup>b</sup>                                      | -2.42 | .000           | .000            |
| Integrin1 pathway <sup>c</sup>                                             | -2.41 | .000           | .001            |
| ECM regulators <sup>d</sup>                                                | -2.39 | .000           | .001            |
| Olfactory transduction <sup>b</sup>                                        | -2.38 | .000           | .001            |
| Collagen formation <sup>a</sup>                                            | -2.38 | .000           | .001            |
| Amine ligand-binding receptors <sup>a</sup>                                | -2.37 | .000           | .002            |
| ECM affiliated <sup>d</sup>                                                | -2.34 | .000           | .003            |
| Potassium channels <sup>a</sup>                                            | -2.33 | .000           | .003            |
| Secreted factors <sup>d</sup>                                              | -2.26 | .000           | .006            |
| Proteoglycans <sup>d</sup>                                                 | -2.25 | .000           | .006            |
| uPA-uPAR pathway <sup>c</sup>                                              | -2.23 | .000           | .010            |
| Regulation of IGF activity by IGFBPs <sup>a</sup>                          | -2.21 | .000           | .013            |
| Syndecan 1 pathway <sup>c</sup>                                            | -2.18 | .001           | .024            |
| Collagens <sup>d</sup>                                                     | -2.17 | .001           | .026            |
| Cell-cell junction organization <sup>a</sup>                               | -2.13 | .001           | .040            |

Databases: <sup>a</sup>REACTOME; <sup>b</sup>KEGG; <sup>c</sup>PID; <sup>d</sup>NABA; <sup>e</sup>BIOCARTA.

## Supplementary Table S10

Most Enriched Pathways in Responders and Nonresponders to Ibrutinib plus Nivolumab with Richter's Transformation

| Pathway Name                                                                   | NES   | FDR<br>P Value | FWER<br>P Value |
|--------------------------------------------------------------------------------|-------|----------------|-----------------|
| <i>Responders</i>                                                              |       |                |                 |
| TCR signaling <sup>a</sup>                                                     | 2.40  | .000           | .000            |
| Generation of second messenger molecules <sup>a</sup>                          | 2.36  | .000           | .000            |
| Costimulation by the CD28 family <sup>a</sup>                                  | 2.35  | .000           | .000            |
| Intestinal immune network for IgA production <sup>b</sup>                      | 2.35  | .000           | .000            |
| Interferon gamma signaling <sup>a</sup>                                        | 2.33  | .000           | .000            |
| Graft versus host disease <sup>b</sup>                                         | 2.31  | .000           | .000            |
| TCR pathway <sup>c</sup>                                                       | 2.29  | .000           | .000            |
| Type I diabetes mellitus <sup>b</sup>                                          | 2.24  | .000           | .000            |
| Downstream TCR signaling <sup>a</sup>                                          | 2.21  | .000           | .000            |
| Antigen processing and presentation <sup>b</sup>                               | 2.18  | .000           | .003            |
| Peptide chain elongation <sup>a</sup>                                          | 2.18  | .000           | .003            |
| PD1 signaling <sup>a</sup>                                                     | 2.18  | .000           | .003            |
| CD8 TCR pathway <sup>c</sup>                                                   | 2.17  | .000           | .004            |
| Metabolism of mRNA <sup>a</sup>                                                | 2.16  | .000           | .004            |
| Allograft rejection <sup>b</sup>                                               | 2.16  | .000           | .005            |
| IL-12 pathway <sup>d</sup>                                                     | 2.16  | .000           | .006            |
| 3'UTR mediated translational regulation <sup>a</sup>                           | 2.13  | .001           | .008            |
| Ribosome <sup>b</sup>                                                          | 2.12  | .001           | .009            |
| BCR5 pathway <sup>c</sup>                                                      | 2.11  | .001           | .009            |
| Metabolism of RNA <sup>a</sup>                                                 | 2.10  | .001           | .010            |
| <i>Nonresponders</i>                                                           |       |                |                 |
| Core matrisome <sup>e</sup>                                                    | -2.46 | .000           | .000            |
| Basement membranes <sup>e</sup>                                                | -2.39 | .000           | .000            |
| Integrin1 pathway <sup>c</sup>                                                 | -2.33 | .000           | .000            |
| ECM organization <sup>a</sup>                                                  | -2.30 | .000           | .000            |
| Collagen formation <sup>a</sup>                                                | -2.27 | .000           | .000            |
| Proteoglycans <sup>e</sup>                                                     | -2.23 | .000           | .000            |
| ECM glycoproteins <sup>e</sup>                                                 | -2.19 | .000           | .000            |
| ECM receptor interaction <sup>b</sup>                                          | -2.18 | .000           | .001            |
| Collagens <sup>e</sup>                                                         | -2.15 | .000           | .004            |
| NCAM1 interactions <sup>a</sup>                                                | -2.09 | .002           | .019            |
| Integrin3 pathway <sup>c</sup>                                                 | -2.01 | .006           | .076            |
| Striated muscle contraction <sup>a</sup>                                       | -1.84 | .042           | .450            |
| Regulation of IGF activity by IGFs <sup>a</sup>                                | -1.81 | .056           | .575            |
| NCAM signaling for neurite outgrowth <sup>a</sup>                              | -1.79 | .067           | .659            |
| Integrin cell surface interactions <sup>a</sup>                                | -1.79 | .063           | .662            |
| AMI pathway <sup>d</sup>                                                       | -1.77 | .071           | .727            |
| Keratan sulfate biosynthesis <sup>a</sup>                                      | -1.77 | .074           | .766            |
| $\alpha\beta$ 3 integrin pathway <sup>c</sup>                                  | -1.76 | .071           | .771            |
| Deposition of new CENP-A-containing nucleosomes at the centromere <sup>a</sup> | -1.76 | .072           | .791            |
| Syndecan 1 pathway <sup>c</sup>                                                | -1.75 | .077           | .832            |

Databases <sup>a</sup>REACTOME; <sup>b</sup>KEGG; <sup>c</sup>PID; <sup>d</sup>BIOCARTA; <sup>e</sup>NABA.
